# Supplementary material for: Aspirin treatment does not increase microhemorrhage size in young or aged mice
Source: PLoS One. 2019 Jan 4;14(1):e0204295. doi: 10.1371/journal.pone.0204295 (PMC6319729; doi:10.1371/journal.pone.0204295)
Supplement: S2 Table — Data from plot shown in Fig 4a. (CSV) [file pone.0204295.s002.csv]

Diameter (in micrometers) of the red blood cell filled core of laser induced brain hemorrhages from young and old mice treated with aspirin or controls.
young control	young aspirin	aged control	aged aspirin	young heparin
159	118.8314	70.7	133.2288	116.965
110	123.7564	101	111.3402	126.3565
46.2	153.1227	165	158.8835	96.83
134	122.993	85.8	59.81988	88.66
131	127.4966	56.3	87.41675	271.63
99.8	97.74138	161	94.367	122.5
108	82.368	107	101.5749	154.4
88.4	79.0635	129	145.9964	128.4
76.9	94.62788	60.7	89.764	100.9
118	107.2464	57.7	80.277	170.8
74.1	122.02	77.7	78.49857	147.3
144	142.29	97.5	112.0414	146.1
91.3	73.56		88.42363	119.8
234	83.94		66.77613	117.5
166			76.63175	129.6
75.9			135.1228
80.2			123.1676
79.4			80.08188
86
111
96.6
65.8
63.2
147.6
79.7
72.2
76.4
97.6
106.1
